# Supplementary material
Source: PubMed Central journal article supplement (PMC3709857)

**A**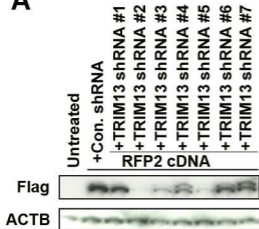**B**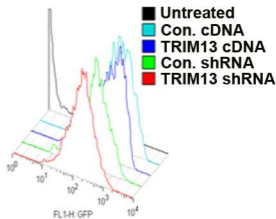**C**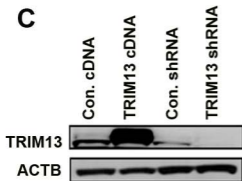

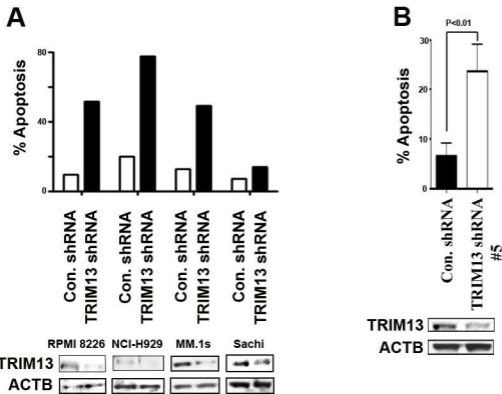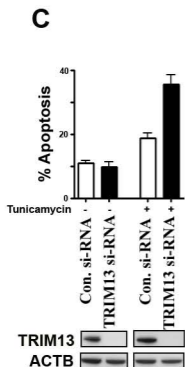

Supplemental  
FIGURE 2

**A**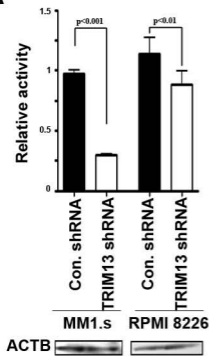**B**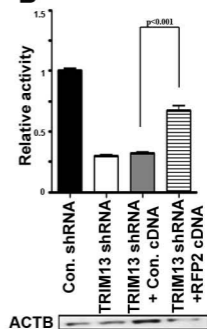**C**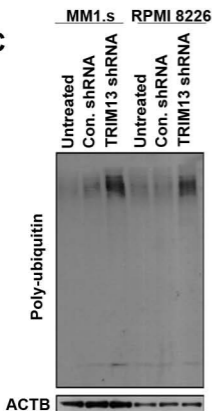**D**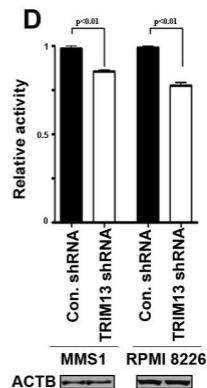

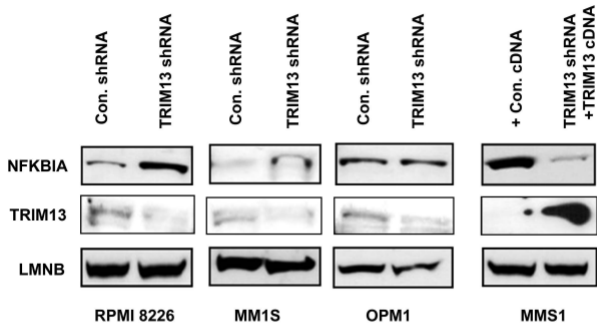

Supplemental  
**FIGURE 4**

**Gatt et al.**

Supplement: NIHMS465600-supplement-Supp_Fig_S1-S4.pdf [file NIHMS465600-supplement-Supp_Fig_S1-S4.pdf]
